# Supplementary material for: Genetic Variation and Sickle Cell Disease Severity: A Systematic Review and Meta-Analysis
Source: PubMed Central journal article supplement (PMC10585422; doi:10.1001/jamanetworkopen.2023.37484), 2023-10-18
Supplement: jamanetwopen-e2337484-s003.pdf [file jamanetwopen-e2337484-s003.pdf]

## Data Sharing Statement

Kirkham. Genetic Variation and Sickle Cell Disease Severity. *JAMA Netw Open*. Published October 12, 2023. doi:10.1001/jamanetworkopen.2023.37484

### Data

**Data available:** Yes

**Data types:** Data (not involving human participants)

**How to access data:** All extracted data used in all analyses and results presented in this manuscript are included in eTables 1-3.

**When available:** With publication

### Supporting Documents

**Document types:** None

### Additional Information

**Who can access the data:** Anyone

**Types of analyses:** All

**Mechanisms of data availability:** All
